# Supplementary material
Source: PubMed Central journal article supplement (PMC7726788)
Supplement: ao0c03707_si_001.pdf [file ao0c03707_si_001.pdf]

# Supporting information

## **Valine Supplementation Does Not Reduce Lipid Accumulation and Improve Insulin sensitivity in Mice Fed High-Fat Diet**

Qingquan Ma,<sup>§</sup> Linlin Hu,<sup>§</sup> Jialiang Zhu, Jiayi Chen, Zhishen Wang, Zhiyuan Yue,  
Minna Qiu and Anshan Shan\*

Institute of Animal Nutrition, Northeast Agricultural University, Harbin, 150030,  
China

\*To whom correspondence should be addressed. E-mail: [asshan@neau.edu.cn](mailto:asshan@neau.edu.cn);  
[mqqwill@163.com](mailto:mqqwill@163.com)

<sup>§</sup> These authors contributed equally to this manuscript.

## **Supporting information**

Figure S1. The PCA, OPLS-DA score plot and Volcano Plot for the metabolic profiling results of liver tissue for HV versus HW

Figure S2. Volcano Plot and Hierarchical Clustering of differential genes for HV versus HW

Figure S3. Gene ontology (GO) enrichment histogram of differential genes

Figure S4. The Venn of differential genes and differential metabolites involved in pathways and the top 10 pathways with the highest number of genes and metabolites involved

Figure S5. Correlation analysis Spearman differential genes and differential metabolites

Table S1. Summary of significantly different metabolites between HV and HW based on a OPLS-DA VIP (Variable Importance for the Projection) more than 1

Table S2. Summary of significantly different genes between HV and HW by transcriptomics



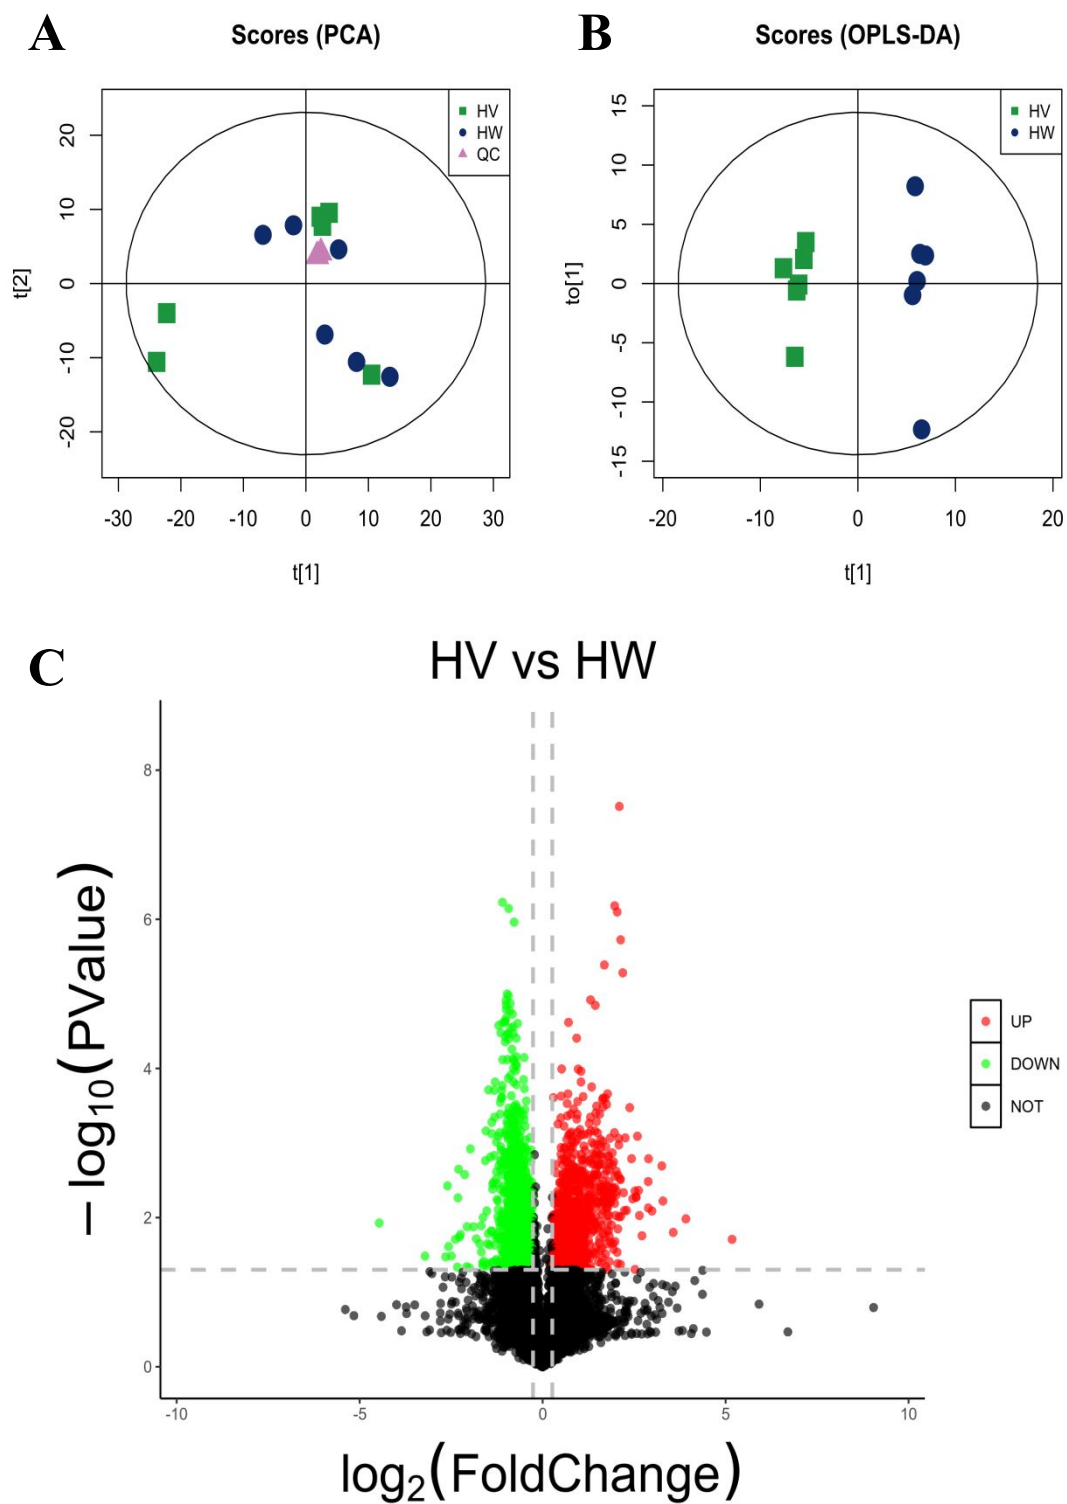

**Figure S1.** The PCA, OPLS-DA score plot and Volcano Plot for the metabolic profiling results of liver tissue for HV versus HW. A: PCA score plot. t[1] represents principal component 1, and t[2] represents principal component

2. B: OPLS-DA score plot.  $t[1]$  represents the predicted principal component and can distinguish group variations.

C: Volcano Plot. The dots represents metabolites with  $FC > 1.5$  and  $P \text{ value} < 0.05$ . Red dots indicate up-regulated metabolites in HV, and green dots indicate down-regulated metabolites in HV. Abbreviations: High-fat diet + valine (HV); high-fat diet + water (HW); quality control (QC); principal component analysis (PCA); orthogonal partial least squares discrimination analysis (OPLS-DA); fold change analysis (FC).

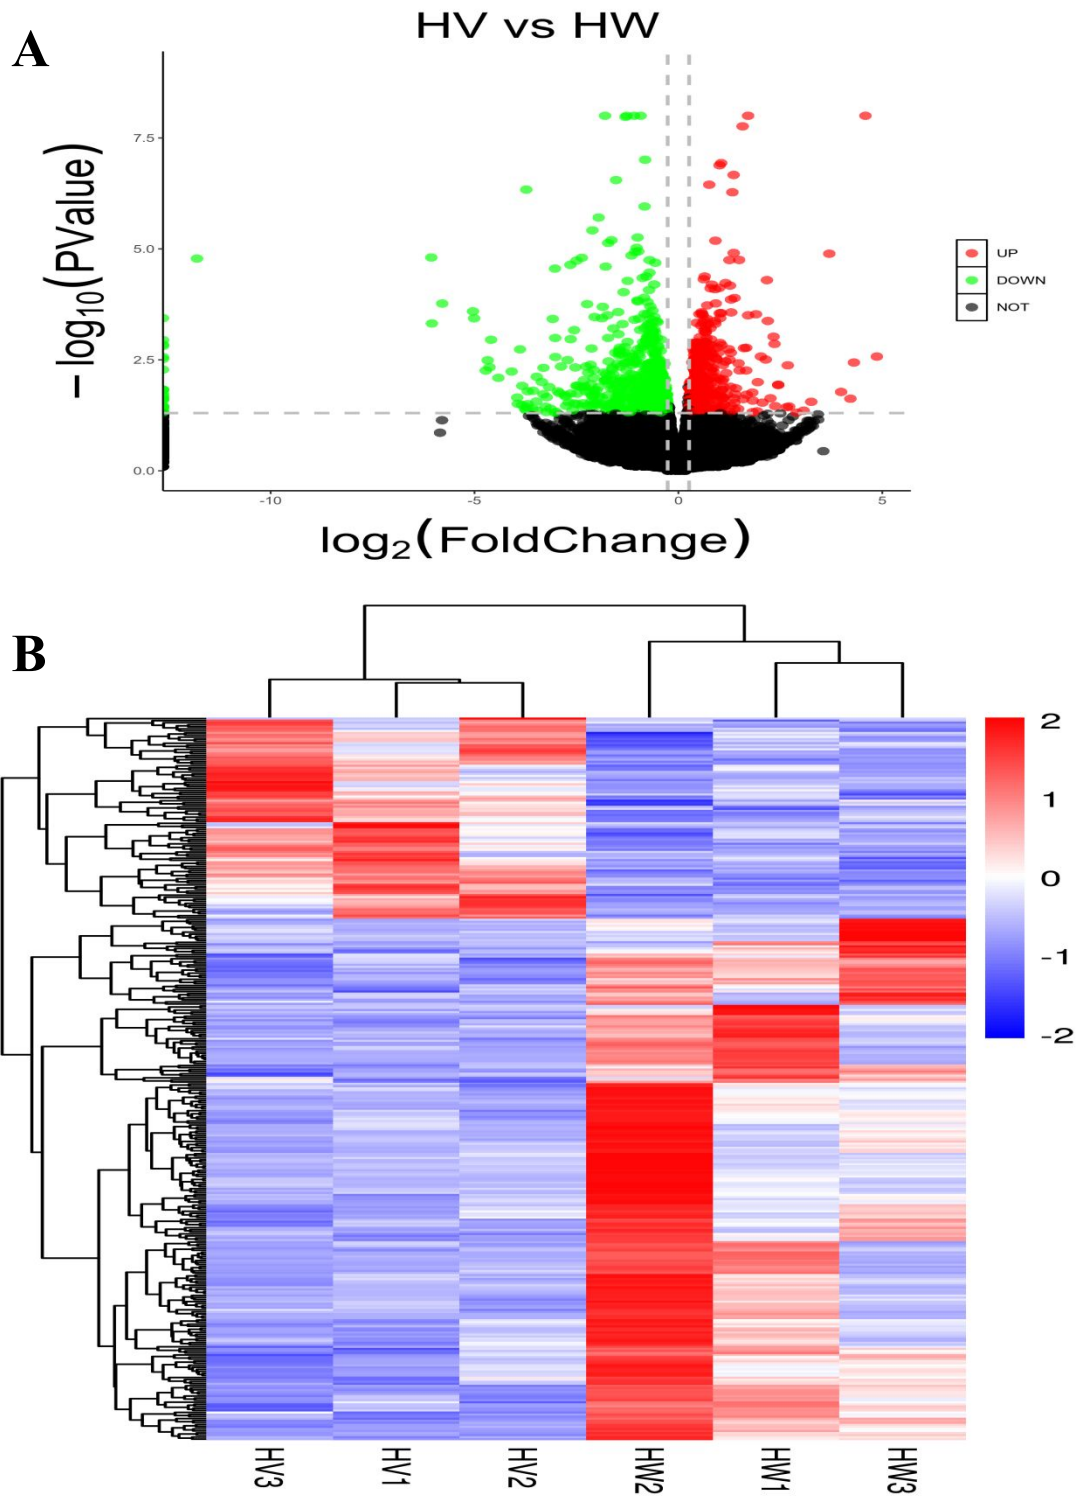

**Figure S2.** Volcano Plot and Hierarchical Clustering of differential genes for HV versus HW. A: Volcano Plot.

The black dots represent the genes with no significant difference, the red dots represent the up-regulated genes with significant difference, and the green dots represent the down-regulated genes with significant difference. B:

The Hierarchical Clustering of differential genes. Red indicates the up-regulated genes in HV, and blue indicates the down-regulated genes in HV. Scaled expression values are color-coded according to the legend on the right.

Abbreviations: High-fat diet + valine (HV); high-fat diet + water (HW).

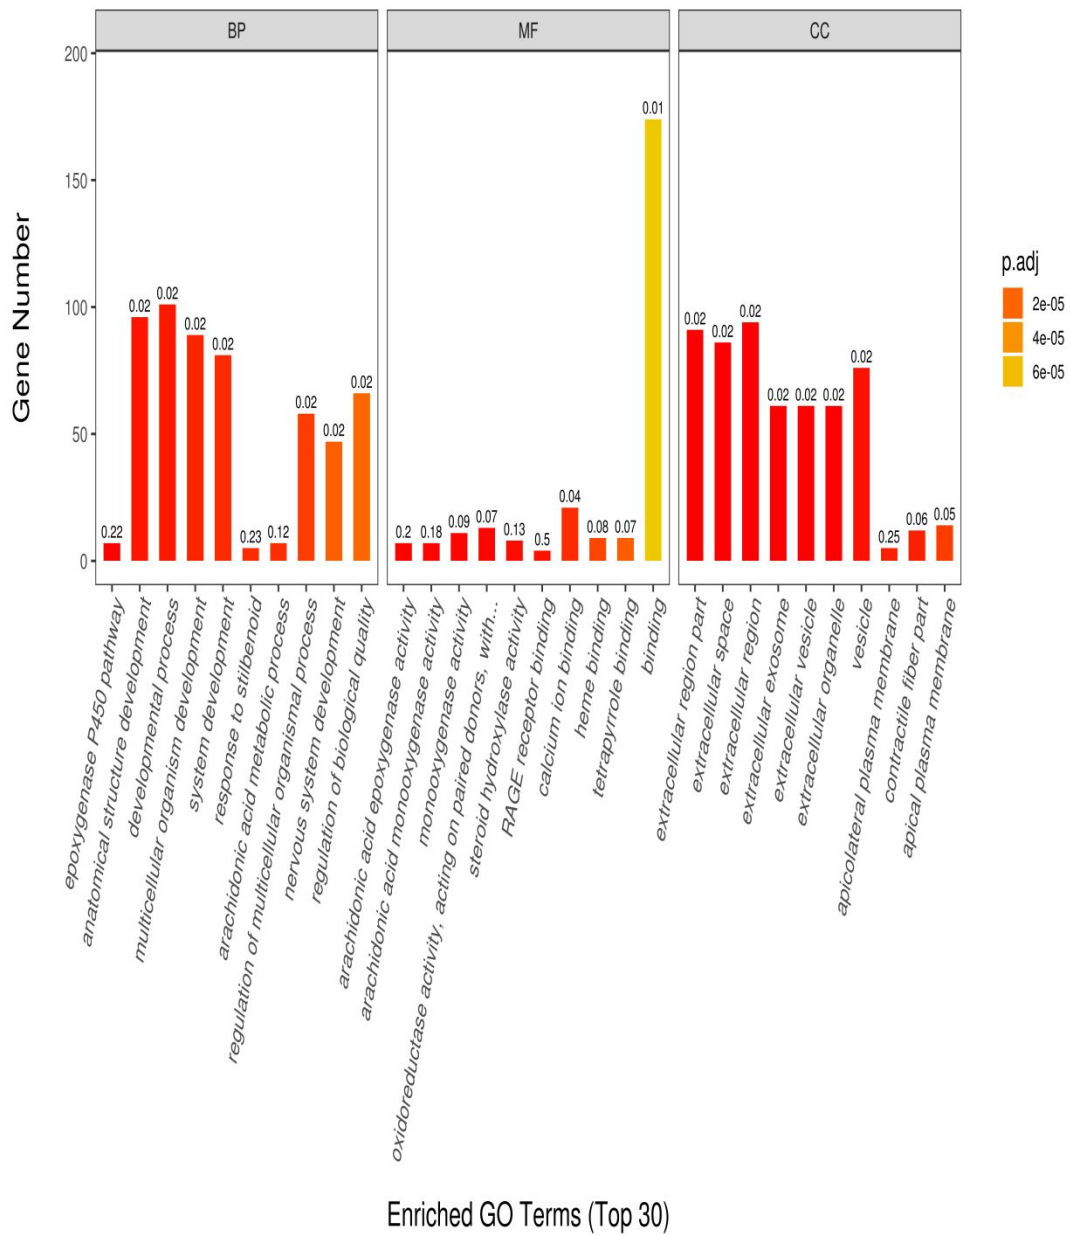

**Figure S3.** Gene ontology (GO) enrichment histogram of differential genes. Abbreviations of classifications: BP: biological processes; MF: molecular functions; CC: cellular components.



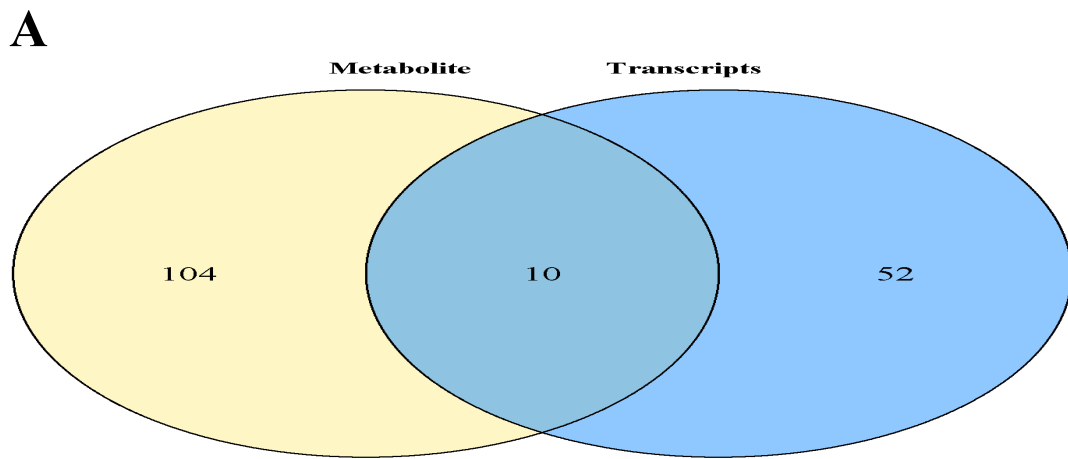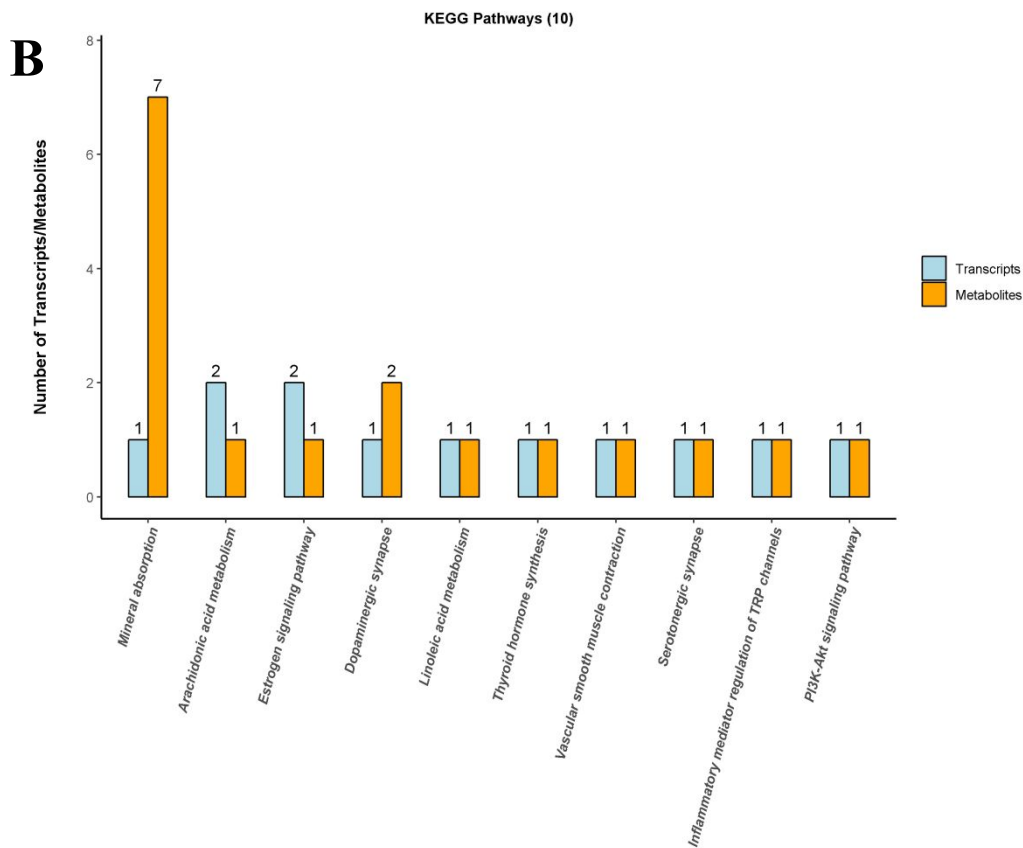

**Figure S4.** A: The Venn of differential genes and differential metabolites involved in pathways. Blue for transcriptomics, yellow for metabolomics; the cross region of the circle represents the number of metabolic pathways involved in both omics. The sum of all figures inside the circle represents the sum of the number of pathways involved in differentially expressed genes and differentially expressed metabolites, respectively. The cross region of the circle represents the number of pathways involved in both omics. B: The top 10 pathways with the highest number of genes and metabolites involved. Each column represents a KEGG pathway, blue for

transcriptomics, orange for metabolomics. From left to right, by number of genes or metabolites, from high to low.  
The higher the column, the more molecules the biological pathway is annotated in the sample.

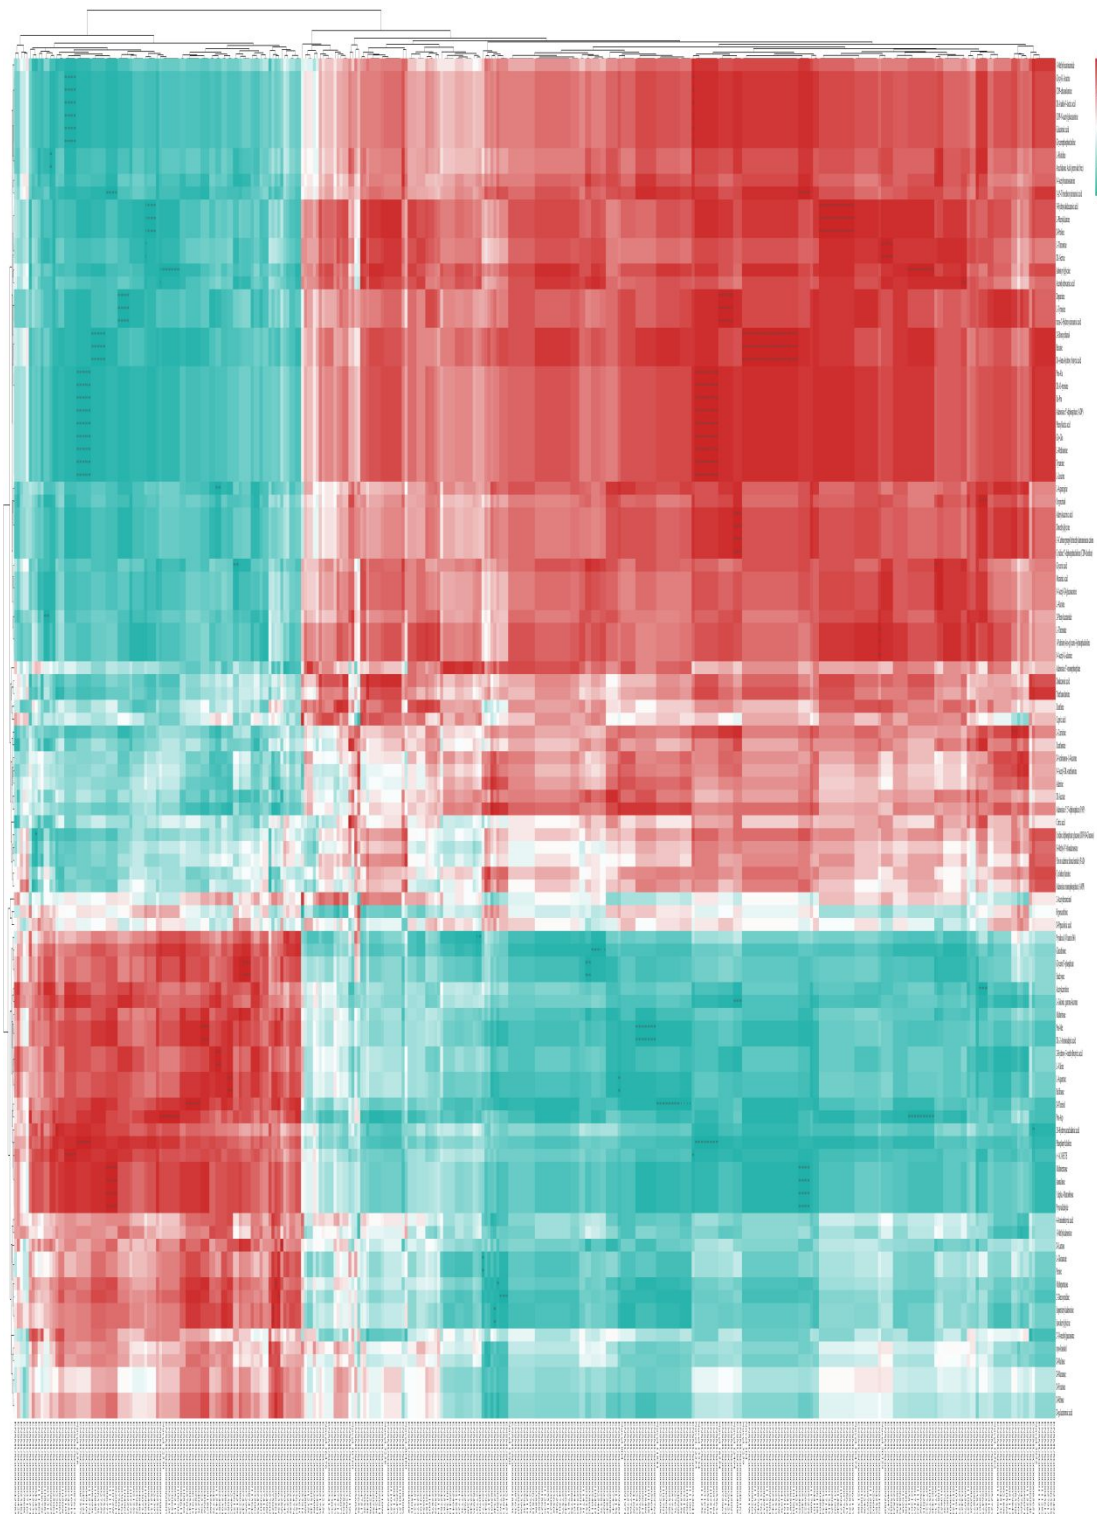

**Figure S5.** Correlation analysis Spearman differential genes and differential metabolites. Each row represents a significant difference in metabolites and each column represents a significant difference in genes. The left branch indicates the result of clustering the differential metabolites, and the upper branch indicates the result of clustering the differential genes. Each lattice in the figure contains two kinds of information (correlation coefficient  $r$  and  $p$

value). Correlation coefficient  $r$  expressed in color.  $r > 0$  means positive correlation, in red,  $r < 0$ , in blue, the deeper the color, the stronger the correlation.  $P < 0.05$ , expressed as \*;  $P < 0.001$ , expressed as \*\*\*.

**Table S1. Summary of significantly different metabolites between HV and HW based on a OPLS-DA VIP (Variable Importance for the Projection) more than 1**

| name       | description             | Fold    |            | p-value    | m/z    | rt(s)  | KEGG.I<br>D |
|------------|-------------------------|---------|------------|------------|--------|--------|-------------|
|            |                         | VIP     | chang<br>e |            |        |        |             |
| M104T400   | Dimethylglycine         | 2.0173  | 0.1920     | 1.7284E-08 | 104.07 | 400.03 | C01026      |
| M229T244   | Ile-Pro                 | 1.7201  | 0.5477     | 1.9894E-05 | 229.15 | 244.15 |             |
| M222T256   | N-Acetyl-D-glucosamine  | 3.6270  | 0.6720     | 3.5309E-05 | 222.10 | 255.56 | C00140      |
| M204T254   | N-Acetylmannosamine     | 3.7405  | 0.7052     | 0.0001     | 204.09 | 254.28 | C00645      |
| M162T328   | DL-2-Aminoadipic acid   | 1.3556  | 2.2228     | 0.0001     | 162.08 | 327.60 | C00956      |
| M146T258   | DL-O-tyrosine           | 1.1389  | 0.7282     | 0.0002     | 146.06 | 257.58 |             |
| M464T489   | Adenylsuccinic acid     | 1.2467  | 0.2527     | 0.0007     | 464.08 | 489.28 | C03794      |
| M120T256_2 | Tyramine                | 10.6932 | 0.7527     | 0.0008     | 120.08 | 255.58 | C00483      |
| M447T443   | CDP-ethanolamine        | 1.3754  | 0.4224     | 0.0008     | 447.07 | 443.34 | C00570      |
| M188T257   | DL-Indole-3-lactic acid | 3.3469  | 0.7211     | 0.0009     | 188.07 | 257.44 |             |
| M131T256   | Phenyllactic acid       | 1.1339  | 0.7713     | 0.0009     | 131.05 | 255.58 | C05607      |
| M364T392   | 2'-O-methylguanosine    | 1.7213  | 6.4327     | 0.0010     | 364.06 | 391.76 |             |

| name           | description                                   | Fold        |        |         | m/z        | rt(s)      | KEGG.I<br>D |
|----------------|-----------------------------------------------|-------------|--------|---------|------------|------------|-------------|
|                |                                               | VIP         | chang  | p-value |            |            |             |
| M187T337       | Pro-Ala                                       | 1.6434      | 0.4857 | 0.0010  | 187.1<br>1 | 337.3<br>6 |             |
| M489T439       | Cytidine 5'-diphosphocholine<br>(CDP-choline) | 2.8065      | 0.5448 | 0.0011  | 489.1<br>1 | 439.1<br>8 | C00307      |
| M428T457       | Adenosine 5'-diphosphate (ADP)                | 1.0002      | 0.8234 | 0.0012  | 428.0<br>4 | 457.0<br>8 | C00008      |
| M166T256_<br>2 | L-Phenylalanine                               | 7.8093      | 0.7651 | 0.0019  | 166.0<br>9 | 255.5<br>8 | C00079      |
| M198T278       | D-Mannose                                     | 2.2034      | 1.6844 | 0.0025  | 198.1<br>0 | 278.1<br>3 | C00159      |
| M121T112       | Purine                                        | 1.7964      | 1.6777 | 0.0025  | 121.0<br>5 | 111.7<br>0 | C15587      |
| M285T308       | Xanthosine                                    | 1.7257      | 0.7046 | 0.0028  | 285.0<br>8 | 308.3<br>1 | C01762      |
| M608T429       | UDP-N-acetylglucosamine                       | 1.9253      | 0.5377 | 0.0031  | 608.0<br>9 | 428.9<br>9 | C00043      |
| M153T308       | Oxypurinol                                    | 2.1899      | 0.7017 | 0.0033  | 153.0<br>4 | 308.3<br>1 | C07599      |
| M522T446_<br>2 | Maltotriose                                   | 16.482<br>1 | 3.2292 | 0.0037  | 522.2<br>0 | 446.1<br>7 | C01835      |
| M165T299       | trans-2-Hydroxycinnamic acid                  | 2.7744      | 0.7546 | 0.0038  | 165.0<br>5 | 299.3<br>3 |             |
| M428T487       | Adenosine 3',5'-diphosphate (PAP)             | 1.6502      | 0.4430 | 0.0039  | 428.0<br>4 | 486.6<br>4 | C00054      |
| M132T261       | L-Leucine                                     | 5.5898      | 0.8224 | 0.0040  | 132.1<br>0 | 260.9<br>7 | C00123      |

| name       | description                       | Fold   |        |         | m/z        | rt(s)      | KEGG.I<br>D |
|------------|-----------------------------------|--------|--------|---------|------------|------------|-------------|
|            |                                   | VIP    | chang  | p-value |            |            |             |
| M136T299   | Dopamine                          | 2.3987 | 0.7661 | 0.0046  | 136.0<br>8 | 299.3<br>3 | C03758      |
| M182T299_2 | L-Tyrosine                        | 3.2766 | 0.7583 | 0.0047  | 182.0<br>8 | 299.3<br>3 | C00082      |
| M258T426   | Glycerophosphocholine             | 6.6027 | 0.3538 | 0.0050  | 258.1<br>1 | 425.6<br>1 | C00670      |
| M649T487   | Stachyose                         | 2.6248 | 5.0610 | 0.0055  | 649.2<br>2 | 486.7<br>6 | C01613      |
| M310T426   | Pro-Met                           | 2.4572 | 1.5186 | 0.0064  | 310.1<br>1 | 425.5<br>8 |             |
| M116T308_2 | D-Proline                         | 7.1607 | 0.8258 | 0.0065  | 116.0<br>7 | 307.9<br>3 | C00763      |
| M336T63_1  | Isopentenyladenosine              | 1.9029 | 1.4729 | 0.0094  | 336.1<br>7 | 62.81      |             |
| M150T282   | L-Methionine                      | 2.6940 | 0.8003 | 0.0095  | 150.0<br>6 | 281.7<br>0 | C00073      |
| M196T46    | 2-Phenylacetamide                 | 1.4285 | 0.6713 | 0.0112  | 196.1<br>0 | 45.78      |             |
| M786T394   | Flavin adenine dinucleotide (FAD) | 1.1451 | 0.8678 | 0.0116  | 786.1<br>7 | 394.2<br>5 | C00016      |
| M360T424   | Isomaltose                        | 1.4754 | 1.4447 | 0.0137  | 360.1<br>5 | 424.3<br>7 | C00252      |
| M522T365   | Raffinose                         | 1.2418 | 2.0479 | 0.0147  | 522.1<br>9 | 365.4<br>9 | C00492      |
| M213T415_2 | Triethanolamine                   | 4.1421 | 0.5891 | 0.0159  | 213.1<br>2 | 414.8<br>0 | C06771      |

| name           | description                               | Fold        |        |         | m/z        | rt(s)      | KEGG.I<br>D |
|----------------|-------------------------------------------|-------------|--------|---------|------------|------------|-------------|
|                |                                           | VIP         | chang  | p-value |            |            |             |
| M118T272_<br>2 | Betaine                                   | 21.995<br>2 | 0.5443 | 0.0163  | 118.0<br>9 | 271.5<br>6 | C00719      |
| M325T387       | 3.alpha.-Mannobiose                       | 17.755<br>4 | 1.7243 | 0.0168  | 325.1<br>1 | 386.7<br>8 |             |
| M829T505       | Maltopentaose                             | 1.4116      | 2.4245 | 0.0175  | 829.2<br>9 | 504.9<br>2 |             |
| M204T303       | Acetylcarnitine                           | 2.3464      | 1.2581 | 0.0176  | 204.1<br>2 | 303.3<br>4 | C02571      |
| M667T388       | Maltotetraose                             | 1.0107      | 1.8244 | 0.0180  | 667.2<br>3 | 387.7<br>3 | C02052      |
| M162T353       | L-Carnitine                               | 22.666<br>2 | 0.8250 | 0.0210  | 162.1<br>1 | 353.2<br>0 | C00318      |
| M303T48        | 20-Hydroxyarachidonic acid                | 6.8430      | 1.8239 | 0.0282  | 303.2<br>3 | 47.53      |             |
| M145T388       | Pyruvaldehyde                             | 4.4061      | 1.6134 | 0.0306  | 145.0<br>5 | 387.8<br>7 | C00546      |
| M104T369       | 4-Aminobutyric acid                       | 2.0924      | 1.2430 | 0.0327  | 104.0<br>7 | 369.2<br>2 | C00334      |
| M496T195       | 1-Palmitoyl-sn-glycero-3-phosphocholine   | 18.126<br>1 | 0.8774 | 0.0338  | 496.3<br>4 | 194.7<br>0 |             |
| M156T398       | L-Histidine                               | 5.3730      | 0.7730 | 0.0362  | 156.0<br>8 | 397.8<br>5 | C00135      |
| M146T374_<br>2 | (3-Carboxypropyl)trimethylammonium cation | 5.2519      | 0.7777 | 0.0363  | 146.1<br>2 | 374.3<br>6 |             |
| M231T424       | Pro-Asp                                   | 1.0615      | 1.1575 | 0.0393  | 231.1<br>0 | 424.2<br>5 |             |



| name           | description                      | Fold        |        |         | m/z        | rt(s)      | KEGG.I<br>D |
|----------------|----------------------------------|-------------|--------|---------|------------|------------|-------------|
|                |                                  | VIP         | chang  | p-value |            |            |             |
| M137T311       | 1-Methylnicotinamide             | 1.7283      | 0.4833 | 0.0421  | 137.0<br>7 | 310.9<br>5 | C02918      |
| M160T382       | Cyclohexylamine                  | 12.243<br>9 | 0.6489 | 0.0456  | 160.1<br>3 | 381.7<br>3 | C00571      |
| M132T336       | 2-Ethoxyethanol                  | 1.9021      | 0.5651 | 0.0459  | 132.1<br>0 | 336.1<br>1 | C14687      |
| M133T376       | L-Asparagine                     | 1.5707      | 0.6487 | 0.0459  | 133.0<br>6 | 376.4<br>4 | C00152      |
| M134T428       | L-Aspartate                      | 1.1315      | 1.7521 | 0.0488  | 134.0<br>4 | 427.9<br>8 | C00049      |
| M137T131       | Hypoxanthine                     | 2.3476      | 0.7410 | 0.0539  | 137.0<br>5 | 131.1<br>1 | C00262      |
| M269T34        | Arachidonic Acid (peroxide free) | 1.0672      | 0.6967 | 0.0568  | 269.2<br>3 | 33.65      | C00219      |
| M348T467       | Adenosine monophosphate (AMP)    | 2.0092      | 0.5660 | 0.0575  | 348.0<br>7 | 466.5<br>8 | C00020      |
| M184T489_<br>2 | Phosphorylcholine                | 12.797<br>3 | 1.1169 | 0.0580  | 184.0<br>7 | 489.2<br>8 | C00588      |
| M348T404       | Adenosine 3'-monophosphate       | 1.0756      | 0.8739 | 0.0622  | 348.0<br>7 | 403.9<br>1 | C01367      |
| M130T305       | D-Pipecolinic acid               | 1.0304      | 1.1567 | 0.0633  | 130.0<br>9 | 305.4<br>2 |             |
| M173T432       | Glycerol 3-phosphate             | 1.4229      | 1.6552 | 0.0693  | 173.0<br>2 | 432.2<br>6 | C00093      |
| M298T100       | S-Methyl-5'-thioadenosine        | 5.5914      | 0.6766 | 0.0765  | 298.1<br>0 | 100.2<br>3 | C00170      |

| name     | description        | Fold   |        |         | m/z        | rt(s)      | KEGG.I<br>D |
|----------|--------------------|--------|--------|---------|------------|------------|-------------|
|          |                    | VIP    | chang  | p-value |            |            |             |
| M282T289 | 1-Methyladenosine  | 1.7594 | 1.3104 | 0.0790  | 282.1<br>2 | 288.8<br>7 | C02494      |
| M148T425 | L-Glutamate        | 1.4642 | 1.1514 | 0.0833  | 148.0<br>6 | 425.0<br>4 | C00025      |
| M136T249 | Adenine            | 1.5493 | 0.5748 | 0.0894  | 136.0<br>6 | 249.0<br>4 | C00147      |
| M205T420 | Gly-Glu            | 1.5339 | 0.7652 | 0.0973  | 205.0<br>8 | 420.2<br>2 |             |
| M194T275 | 2-Acetylresorcinol | 1.0800 | 1.6211 | 0.0990  | 194.0<br>8 | 275.3<br>9 |             |

VIP>1 and P value<0.05 metabolites, as metabolites with significant differences; while VIP>1 and 0.05<P value<0.1 as differential metabolites.

**Table S2. Summary of significantly different genes between HV and HW by transcriptomics**

| gene_ID                 | symbol    | HV_readcount | HW_readcount | log2FoldChange | pvalue   |
|-------------------------|-----------|--------------|--------------|----------------|----------|
| ENSMUSG00000004<br>0660 | Cyp2b9    | 123.54       | 5.14         | 4.6145         | 1.99E-19 |
| ENSMUSG00000007<br>2849 | Serpina1e | 47463.43     | 100919.29    | -1.0883        | 6.84E-16 |
| ENSMUSG00000008<br>7412 | Gm15501   | 171.94       | 52.59        | 1.7074         | 2.40E-12 |
| ENSMUSG00000000<br>6445 | Epha2     | 603.59       | 1147.66      | -0.9267        | 3.62E-12 |
| ENSMUSG00000009<br>0877 | Hspa1b    | 277.7        | 966.3        | -1.7991        | 6.56E-12 |
| ENSMUSG00000003<br>0827 | Fgf21     | 199.48       | 479.65       | -1.2649        | 9.93E-12 |
| ENSMUSG00000005<br>2302 | Tbc1d30   | 152.91       | 376.09       | -1.2998        | 6.24E-10 |
| ENSMUSG00000002<br>4986 | Hhex      | 961.11       | 322.5        | 1.5744         | 7.31E-09 |
| ENSMUSG00000003<br>0852 | Tacc2     | 520.59       | 917.06       | -0.8162        | 8.81E-08 |
| ENSMUSG00000002<br>5396 | Hsd17b6   | 2199.25      | 1062.34      | 1.0502         | 1.06E-07 |
| ENSMUSG00000003<br>5105 | Egln3     | 368.19       | 182.77       | 1.0129         | 1.20E-07 |
| ENSMUSG00000006<br>0807 | Serpina6  | 2100.05      | 820.92       | 1.3548         | 2.06E-07 |

---

| gene_ID                | symbol   | HV_readcount | HW_readcount | log2FoldChange | pvalue   |
|------------------------|----------|--------------|--------------|----------------|----------|
| ENSMUSG0000010<br>5703 | Gm43305  | 246.86       | 712.4        | -1.5277        | 2.71E-07 |
| ENSMUSG0000002<br>8194 | Ddah1    | 2720.09      | 1610.73      | 0.7561         | 3.48E-07 |
| ENSMUSG0000005<br>3469 | Tg       | 2.26         | 30           | -3.7158        | 4.52E-07 |
| ENSMUSG0000002<br>3087 | Noct     | 264.06       | 105.51       | 1.3229         | 5.19E-07 |
| ENSMUSG0000004<br>8856 | Slc25a47 | 12100.24     | 21497.87     | -0.8292        | 1.10E-06 |
| ENSMUSG0000002<br>5004 | Cyp2c40  | 18.55        | 71.97        | -1.9578        | 1.95E-06 |
| Novel.16475            | -        | 16.79        | 72.37        | -2.1081        | 3.81E-06 |
| ENSMUSG0000003<br>8880 | Mrps34   | 255.38       | 511.07       | -1.0002        | 5.52E-06 |
| ENSMUSG0000000<br>2944 | Cd36     | 2658.58      | 1416.48      | 0.9084         | 6.53E-06 |
| ENSMUSG0000001<br>8830 | Myh11    | 76.82        | 239.58       | -1.6389        | 6.38E-06 |
| ENSMUSG0000005<br>7278 | Snrpg    | 33.49        | 110.52       | -1.7243        | 7.36E-06 |
| ENSMUSG0000002<br>0423 | Btg2     | 115.05       | 234.26       | -1.0284        | 9.43E-06 |
| ENSMUSG0000003<br>8599 | Capn8    | 148.48       | 293.6        | -0.9806        | 1.14E-05 |
| ENSMUSG0000007         | Thbd     | 81.35        | 169.54       | -1.057         | 1.17E-05 |

---

| gene_ID                | symbol   | HV_readcount | HW_readcount | log2FoldChange | pvalue   |
|------------------------|----------|--------------|--------------|----------------|----------|
| 4743                   |          |              |              |                |          |
| ENSMUSG0000009<br>1867 | Cyp2a22  | 143.61       | 56.06        | 1.3601         | 1.23E-05 |
| ENSMUSG0000007<br>5044 | Slc22a29 | 22.49        | 1.73         | 3.7431         | 1.28E-05 |
| ENSMUSG0000005<br>5116 | Arntl    | 172.94       | 383.97       | -1.15          | 1.40E-05 |
| ENSMUSG0000002<br>9188 | Slc34a2  | 8.57         | 48.49        | -2.502         | 1.84E-05 |
| ENSMUSG0000004<br>7517 | Dmbt1    | 0.68         | 2434.8       | -11.8243       | 1.65E-05 |
| ENSMUSG0000002<br>0000 | Moxd1    | 14.53        | 969.53       | -6.0562        | 1.56E-05 |
| ENSMUSG0000011<br>2774 | Gm36041  | 113.85       | 40.53        | 1.494          | 1.77E-05 |
| ENSMUSG0000011<br>5919 | Gm31583  | 1113.79      | 1818.23      | -0.7071        | 1.79E-05 |
| ENSMUSG0000007<br>9507 | H2-Q1    | 139.83       | 58.71        | 1.2508         | 1.78E-05 |
| Novel.11841            | -        | 11.72        | 60.5         | -2.3639        | 1.59E-05 |
| ENSMUSG0000005<br>7342 | Sphk2    | 1200.76      | 1778.18      | -0.5661        | 2.05E-05 |
| ENSMUSG0000002<br>0911 | Krt19    | 12.45        | 78.1         | -2.6467        | 2.29E-05 |
| Novel.19562            | -        | 16.16        | 55.65        | -1.7867        | 2.50E-05 |

---

| <b>gene_ID</b>          | <b>symbol</b>     | <b>HV_readcount</b> | <b>HW_readcount</b> | <b>log2FoldChange</b> | <b>pvalue</b> |
|-------------------------|-------------------|---------------------|---------------------|-----------------------|---------------|
| ENSMUSG00000004<br>2784 | Muc1              | 7.39                | 60.25               | -3.0158               | 2.78E-05      |
| ENSMUSG00000005<br>0445 | Cyp8b1            | 12243.39            | 20015.67            | -0.7091               | 3.43E-05      |
| ENSMUSG00000002<br>6249 | Serpine2          | 384.34              | 662.11              | -0.7828               | 4.18E-05      |
| ENSMUSG00000001<br>0601 | Apol7a            | 2184.02             | 1396.87             | 0.6448                | 4.19E-05      |
| ENSMUSG00000002<br>9009 | Mthfr             | 372.33              | 683.83              | -0.8761               | 4.51E-05      |
| ENSMUSG00000002<br>9369 | Afm               | 2519.37             | 1637.84             | 0.6213                | 4.82E-05      |
| ENSMUSG00000004<br>9124 | Gm8186            | 61.41               | 13.64               | 2.1732                | 5.05E-05      |
| ENSMUSG00000005<br>6966 | Gjc3              | 42.19               | 100.03              | -1.2431               | 5.26E-05      |
| ENSMUSG00000005<br>2117 | D630039A<br>03Rik | 344.95              | 154.81              | 1.1538                | 5.89E-05      |
| ENSMUSG00000002<br>5405 | Inhbc             | 1417.87             | 801.59              | 0.8232                | 6.40E-05      |
| ENSMUSG00000003<br>7465 | Klf10             | 410.02              | 618.25              | -0.5931               | 6.33E-05      |
| ENSMUSG00000008<br>7579 | Hectd2os          | 263.4               | 109.68              | 1.2661                | 6.72E-05      |
| ENSMUSG00000005<br>5301 | Adh7              | 608.92              | 352.07              | 0.7897                | 7.69E-05      |

---

---

| gene_ID                | symbol            | HV_readcount | HW_readcount | log2FoldChange | pvalue     |
|------------------------|-------------------|--------------|--------------|----------------|------------|
| ENSMUSG0000005<br>2133 | Sema5b            | 177.01       | 88.45        | 1.0024         | 7.57E-05   |
| ENSMUSG0000007<br>3155 | 1810058I2<br>4Rik | 751.02       | 402.82       | 0.8988         | 8.09E-05   |
| ENSMUSG0000002<br>5316 | Banp              | 143.57       | 236.39       | -0.7211        | 8.44E-05   |
| ENSMUSG0000003<br>4634 | Ly6d              | 54.03        | 137.09       | -1.3443        | 9.43E-05   |
| ENSMUSG0000002<br>9695 | Aass              | 7698.27      | 13793.35     | -0.8414        | 0.0001264  |
| ENSMUSG0000004<br>5776 | Lrtm1             | 201.55       | 77.64        | 1.3759         | 0.00012765 |
| ENSMUSG0000004<br>0270 | Bach2             | 182.15       | 74.49        | 1.2889         | 0.00013853 |
| ENSMUSG0000002<br>6475 | Rgs16             | 471.16       | 945.78       | -1.0066        | 0.00014493 |
| ENSMUSG0000005<br>0234 | Gja4              | 66.93        | 133.49       | -0.9909        | 0.00015234 |
| ENSMUSG0000001<br>9768 | Esr1              | 242.66       | 410.44       | -0.7599        | 0.00015697 |
| ENSMUSG0000005<br>1359 | Ncald             | 292.44       | 154.99       | 0.9153         | 0.00016933 |
| ENSMUSG0000002<br>4028 | Tff2              | 0.3          | 16.62        | -5.5506        | 0.00017033 |
| ENSMUSG0000009<br>2008 | Cyp2c69           | 8.33         | 39.32        | -2.2422        | 0.00017538 |

---

---

| <b>gene_ID</b>         | <b>symbol</b> | <b>HV_readcount</b> | <b>HW_readcount</b> | <b>log2FoldChange</b> | <b>pvalue</b> |
|------------------------|---------------|---------------------|---------------------|-----------------------|---------------|
| ENSMUSG0000003<br>8217 | Tlcd2         | 1364.41             | 836.35              | 0.706                 | 0.00018776    |
| ENSMUSG0000004<br>0740 | Slc25a34      | 220.76              | 355.85              | -0.6878               | 0.00019858    |
| ENSMUSG0000003<br>3998 | Kcnk1         | 8.78                | 31.75               | -1.8464               | 0.00020168    |
| ENSMUSG0000003<br>6966 | Spryd3        | 392.85              | 610.26              | -0.6358               | 0.00024561    |
| ENSMUSG0000001<br>8623 | Mmp7          | 2.24                | 73.57               | -5.0295               | 0.00025507    |
| ENSMUSG0000002<br>7070 | Lrp2          | 20.21               | 56.29               | -1.4661               | 0.00026473    |
| ENSMUSG0000007<br>4207 | Adh1          | 20826.11            | 14071.44            | 0.5656                | 0.00026806    |
| ENSMUSG0000003<br>4774 | Dsg1c         | 131.52              | 53.61               | 1.2916                | 0.00027002    |
| ENSMUSG0000002<br>6655 | Fam107b       | 1563.56             | 1049.05             | 0.5762                | 0.00028559    |
| ENSMUSG0000006<br>3730 | Hsd3b2        | 963.89              | 476.82              | 1.0154                | 0.00028213    |
| ENSMUSG0000003<br>0170 | Wnt5b         | 132.54              | 223.09              | -0.7527               | 0.00029317    |
| ENSMUSG0000003<br>0731 | Syt3          | 101.59              | 49.17               | 1.0459                | 0.00027977    |
| ENSMUSG0000005<br>6131 | Pgm3          | 473.72              | 843.14              | -0.8319               | 0.00029308    |

---



---

| <b>gene_ID</b>         | <b>symbol</b> | <b>HV_readcount</b> | <b>HW_readcount</b> | <b>log2FoldChange</b> | <b>pvalue</b> |
|------------------------|---------------|---------------------|---------------------|-----------------------|---------------|
| ENSMUSG0000003<br>9114 | Nrn1          | 1767.48             | 1236.69             | 0.5149                | 0.00029367    |
| ENSMUSG0000004<br>2686 | Jph1          | 32.41               | 8.67                | 1.9044                | 0.00029745    |
| ENSMUSG0000007<br>2940 | Gm10443       | 22.64               | 75.57               | -1.7327               | 0.00031249    |
| ENSMUSG0000003<br>6611 | Eepd1         | 420.19              | 278.1               | 0.5944                | 0.00030778    |
| ENSMUSG0000002<br>4558 | Mapk4         | 36.05               | 11.02               | 1.7124                | 0.00031346    |
| ENSMUSG0000002<br>2878 | Adipoq        | 0.35                | 7.46                | -4.3974               | 0.0003418     |
| ENSMUSG0000005<br>4641 | Mmrn1         | 15.32               | 63.73               | -2.0448               | 0.00034202    |
| ENSMUSG0000003<br>0494 | Rhpn2         | 330.05              | 495.07              | -0.5849               | 0.00034303    |
| ENSMUSG0000002<br>5656 | Arhgef9       | 86.58               | 42.54               | 1.0223                | 0.00036244    |
| ENSMUSG0000004<br>7730 | Fcgbp         | 2.24                | 72.17               | -5.0021               | 0.00036664    |
| ENSMUSG0000004<br>7767 | Atg16l2       | 184.87              | 360.34              | -0.9624               | 0.00037013    |
| ENSMUSG0000003<br>1995 | St14          | 11.5                | 42.23               | -1.8726               | 0.00036634    |
| ENSMUSG0000004<br>5136 | Tubb2b        | 2.94                | 24.91               | -3.0817               | 0.00037834    |

---

---

| gene_ID                | symbol            | HV_readcount | HW_readcount | log2FoldChange | pvalue     |
|------------------------|-------------------|--------------|--------------|----------------|------------|
| ENSMUSG0000005<br>2957 | Gas1              | 189.35       | 116.24       | 0.7014         | 0.00037914 |
| ENSMUSG0000002<br>2824 | Muc13             | 0            | 9.65         | -5.7279        | 0.00036228 |
| ENSMUSG0000003<br>5372 | 1810055G<br>02Rik | 992.56       | 1602.76      | -0.691         | 0.00037457 |
| Novel.12253            | -                 | 42.61        | 89.9         | -1.082         | 0.00039433 |
| ENSMUSG0000004<br>5092 | S1pr1             | 927.73       | 597.53       | 0.6346         | 0.00039961 |
| ENSMUSG0000002<br>4900 | Cpt1a             | 14986.72     | 18943.49     | -0.338         | 0.0004132  |
| ENSMUSG0000010<br>6705 | Gm2602            | 27.98        | 6.12         | 2.1702         | 0.00042091 |
| ENSMUSG0000000<br>3477 | Inmt              | 5477.94      | 2942.16      | 0.8968         | 0.00042467 |
| ENSMUSG0000006<br>0803 | Gstp1             | 11422.05     | 16576.07     | -0.5373        | 0.00042524 |
| ENSMUSG0000005<br>4484 | Tmem62            | 320.47       | 501.49       | -0.6454        | 0.00044922 |
| ENSMUSG0000005<br>8207 | Serpina3k         | 174954.88    | 248807.53    | -0.508         | 0.00044591 |
| ENSMUSG0000003<br>1924 | Cyb5b             | 6379.97      | 4194.94      | 0.6049         | 0.00045396 |
| ENSMUSG0000001<br>6382 | Pls3              | 1431.09      | 1049.75      | 0.4472         | 0.00046349 |
| ENSMUSG0000002         | Mme               | 901.86       | 544.9        | 0.7275         | 0.00048001 |

---

---

| <b>gene_ID</b>          | <b>symbol</b> | <b>HV_readcount</b> | <b>HW_readcount</b> | <b>log2FoldChange</b> | <b>pvalue</b> |
|-------------------------|---------------|---------------------|---------------------|-----------------------|---------------|
| 7820                    |               |                     |                     |                       |               |
| ENSMUSG00000003<br>4591 | Slc41a2       | 405.48              | 216.32              | 0.9052                | 0.0004843     |
| ENSMUSG00000002<br>0159 | Gabrp         | 0.95                | 62.78               | -6.0237               | 0.00047831    |
| ENSMUSG00000003<br>7139 | Myom3         | 37.24               | 96.12               | -1.3635               | 0.00049347    |
| ENSMUSG00000002<br>4843 | Chka          | 655.27              | 1088.59             | -0.7316               | 0.00049562    |
| ENSMUSG00000004<br>1261 | Car8          | 1529.11             | 1042.2              | 0.5529                | 0.0005328     |
| ENSMUSG00000009<br>2274 | Neat1         | 5660.49             | 9574.84             | -0.7583               | 0.00052896    |
| ENSMUSG00000003<br>1725 | Ces1f         | 7997.95             | 5008.39             | 0.6753                | 0.0005434     |
| ENSMUSG00000000<br>2250 | Ppard         | 137.56              | 212.19              | -0.6239               | 0.0005603     |
| ENSMUSG00000004<br>2099 | Kank3         | 135.47              | 215.82              | -0.6707               | 0.00056509    |

---

P < 0.05 as significant difference criteria

**Table S3 Composition of experimental diets (%)**

| Ingredient        | LFD <sup>1</sup> | HFD <sup>2</sup> |
|-------------------|------------------|------------------|
| Casein            | 18.96            | 25.84            |
| L-Cystine         | 0.28             | 0.39             |
| Corn Starch       | 29.86            | 0                |
| Maltodextrin 10   | 3.32             | 16.15            |
| Sucrose           | 33.17            | 8.90             |
| Cellulose         | 4.74             | 6.46             |
| Soybean Oil       | 2.37             | 3.23             |
| Lard              | 1.90             | 31.66            |
| Mineral Mix       | 0.95             | 1.29             |
| DiCalcium         | 1.23             | 1.68             |
| Calcium           | 0.52             | 0.71             |
| Potassium Citrate | 1.56             | 2.13             |
| Vitamin Mix       | 0.95             | 1.29             |
| Choline           | 0.19             | 0.26             |
| Yellow Dye        | 0.005            |                  |
| Blue Dye          |                  | 0.006            |
| Total             | 100              | 100              |

<sup>1</sup>Containing 67.3% carbohydrate, 4.3% fat, and 19.2% protein on an as-fed basis. 10% of the total energy was provided by fat (mainly lard).

<sup>2</sup>Containing 26.3% carbohydrate, 34.9% fat, and 26.2% protein on an as-fed basis. 60% of the total energy was provided by fat (mainly lard).
